# Supplementary material
Source: HighWire-hosted journal article supplement (https://bmjopen.bmj.com/content/12/7/e062970)
Supplement: inline-supplementary-material-4 [file inline-supplementary-material-4.pdf]

## School of Sport and Exercise Sciences

Summary Assessment Number 

## Hazard and Risk Assessment Summary (for research work)

Assessor Location of Activity  
(list all locations) Date of Assessment Supervisor (if not above) Activity/Experiment Assessed  
(attach protocols) 

| ASSESSMENT OF HAZARD AND RISK                                                                                                                 |                              |                      |   |   |   |   |             |   |   | ACTION REQUIRED    |    |    |   |                                                                                                                                                                                                                                                             |                                                                                                                                                                                                                                                                                                                                                                                                                                                                                                                                                                                                                                                                                                                                                                       |
|-----------------------------------------------------------------------------------------------------------------------------------------------|------------------------------|----------------------|---|---|---|---|-------------|---|---|--------------------|----|----|---|-------------------------------------------------------------------------------------------------------------------------------------------------------------------------------------------------------------------------------------------------------------|-----------------------------------------------------------------------------------------------------------------------------------------------------------------------------------------------------------------------------------------------------------------------------------------------------------------------------------------------------------------------------------------------------------------------------------------------------------------------------------------------------------------------------------------------------------------------------------------------------------------------------------------------------------------------------------------------------------------------------------------------------------------------|
| ACTIVITY/HAZARD<br>(List only hazards from which there is a significant risk of harm under foreseeable conditions)                            | PERSONS AT RISK<br>(See key) | ACTIVITY INVOLVES... |   |   |   |   | RISK RATING |   |   | LIKELIHOOD of HARM |    |    |   | (For example: Is <a href="#">chemical/biological/manual handling</a> /equipment risk assessment required; Is code of practice(COP)/standard operating procedures( <a href="#">SOP</a> ) required. Where risk assessments/COP/SOP exists please attach them) |                                                                                                                                                                                                                                                                                                                                                                                                                                                                                                                                                                                                                                                                                                                                                                       |
|                                                                                                                                               |                              | C                    | B | M | E | R | H           | M | L | Y                  | Pr | Po | R |                                                                                                                                                                                                                                                             |                                                                                                                                                                                                                                                                                                                                                                                                                                                                                                                                                                                                                                                                                                                                                                       |
| 1. During interviews, participants may become emotionally distressed when discussing their thoughts and beliefs regarding their condition.    | Pa                           |                      |   |   |   |   |             |   |   |                    |    |    |   |                                                                                                                                                                                                                                                             | The interviews will be conducted by a GCP trained, HCPC licensed and practising senior physiotherapist. The researcher will act in accordance with CSP Standards of Professional Practice and UoB Guidance for conducting interviews remotely from home during this period. Participants will be informed that they are free to take a break at any time and reminded that their participation is voluntary and that they can choose not to answer questions or to stop the interview should they wish. The participant will be offered if they would like a family member present during the interview to ensure their own wellbeing. The researcher may also signpost participants to relevant support services (e.g. NHS services, Mind, Togetherall, Samaritans). |
| 2. Whilst undertaking interviews the participant may share with the researcher information which raises concern for their wellbeing. This may | Pa                           |                      |   |   |   |   |             |   |   |                    |    |    |   |                                                                                                                                                                                                                                                             | In the case of concern for the participants health, the researcher, who is also GCP trained, HCPC licenced, and a practising senior physiotherapist in a busy NHS physiotherapy department, will implement an appropriate                                                                                                                                                                                                                                                                                                                                                                                                                                                                                                                                             |

|                                                                                                                                     |    |  |  |  |  |  |  |  |  |  |  |  |  |  |  |  |  |  |  |  |  |  |  |  |  |  |  |
|-------------------------------------------------------------------------------------------------------------------------------------|----|--|--|--|--|--|--|--|--|--|--|--|--|--|--|--|--|--|--|--|--|--|--|--|--|--|--|
| include concern for their physical health, mental health or physical safety.                                                        |    |  |  |  |  |  |  |  |  |  |  |  |  |  |  |  |  |  |  |  |  |  |  |  |  |  |  |
| 3. Due to the ongoing pandemic, there is a risk of participants contracting Covid-19 as a result of participating in the interview. | Pa |  |  |  |  |  |  |  |  |  |  |  |  |  |  |  |  |  |  |  |  |  |  |  |  |  |  |
| 4. There is a small risk of verbally aggressive or abusive communication from participants.                                         | Pg |  |  |  |  |  |  |  |  |  |  |  |  |  |  |  |  |  |  |  |  |  |  |  |  |  |  |
| Virtual Interview risks                                                                                                             |    |  |  |  |  |  |  |  |  |  |  |  |  |  |  |  |  |  |  |  |  |  |  |  |  |  |  |
| 5. The participant may share sensitive information through accidental screen sharing.                                               | Pa |  |  |  |  |  |  |  |  |  |  |  |  |  |  |  |  |  |  |  |  |  |  |  |  |  |  |
| 6. Privacy and confidentiality of the participant.                                                                                  | Pa |  |  |  |  |  |  |  |  |  |  |  |  |  |  |  |  |  |  |  |  |  |  |  |  |  |  |
| 7. “Zoom bombing”: leaked link to online video call and unwanted intrusion by an uninvited person.                                  | Pa |  |  |  |  |  |  |  |  |  |  |  |  |  |  |  |  |  |  |  |  |  |  |  |  |  |  |

|                                                                                                                                                   |    |  |  |  |  |  |  |  |  |  |  |  |  |  |  |  |  |  |  |  |  |  |  |  |  |  |                                                                                                                                                                                                                                                                                                                                                                                                                                                                                                                                                                                                                                                                 |
|---------------------------------------------------------------------------------------------------------------------------------------------------|----|--|--|--|--|--|--|--|--|--|--|--|--|--|--|--|--|--|--|--|--|--|--|--|--|--|-----------------------------------------------------------------------------------------------------------------------------------------------------------------------------------------------------------------------------------------------------------------------------------------------------------------------------------------------------------------------------------------------------------------------------------------------------------------------------------------------------------------------------------------------------------------------------------------------------------------------------------------------------------------|
| <p>8. There is a risk of participants sharing or utilising the researchers video platform contact information for non-study related purposes.</p> | Pg |  |  |  |  |  |  |  |  |  |  |  |  |  |  |  |  |  |  |  |  |  |  |  |  |  | <p>strong password which will be shared with only the research participant via a separate and secure email, interviews will only be conducted on sponsor approved and secured platforms, the researcher will use the “waiting room” option when setting up video calls to gate keep the interview, video calls will be locked once the participant has joined preventing uninvited people from joining, settings will be set to have only microphones on with videos off when joining the meeting.</p> <p>The researcher will use a generic profile created for the sole purpose of performing this research project which will be deleted upon completion.</p> |
|---------------------------------------------------------------------------------------------------------------------------------------------------|----|--|--|--|--|--|--|--|--|--|--|--|--|--|--|--|--|--|--|--|--|--|--|--|--|--|-----------------------------------------------------------------------------------------------------------------------------------------------------------------------------------------------------------------------------------------------------------------------------------------------------------------------------------------------------------------------------------------------------------------------------------------------------------------------------------------------------------------------------------------------------------------------------------------------------------------------------------------------------------------|

Key

| PERSONS AT RISK |                              | ACTIVITY INVOLVES... |                                | RISK RATING |        | LIKELIHOOD |                | RISK SIGNIFICANCE |   |    |    | Date for Review |                    |
|-----------------|------------------------------|----------------------|--------------------------------|-------------|--------|------------|----------------|-------------------|---|----|----|-----------------|--------------------|
| Ug              | Undergraduate                | C                    | Chemicals                      | H           | High   | Y          | Yes/ Very High | H                 | Y | Pr | Po | R               | = Significant risk |
| Pg              | Postgraduate                 | B                    | Biological fluids/material     | M           | Medium | Pr         | Probable       | M                 |   |    |    |                 |                    |
| S               | Staff                        | M                    | Manual Hazard e.g. trip hazard | L           | Low    | Po         | Possible       | L                 |   |    |    |                 |                    |
| C               | Contractor                   | E                    | Equipment hazard               |             |        | R          | Remote         |                   |   | X  | X  |                 |                    |
| V               | Visitor                      | R                    | Radioisotope                   |             |        |            |                |                   |   |    |    |                 |                    |
| Pa              | Patient/Experimental subject |                      |                                |             |        |            |                |                   |   |    |    |                 |                    |
| Pu              | General Public               |                      |                                |             |        |            |                |                   |   |    |    |                 |                    |
| Yp              | Young Person                 |                      |                                |             |        |            |                |                   |   |    |    |                 |                    |
| Nm              | New/Expectant Mother         |                      |                                |             |        |            |                |                   |   |    |    |                 |                    |

GUIDANCE FOR WRITING THIS ASSESSMENT CAN BE FOUND [HERE](#)
